# Supplementary material
Source: PubMed Central journal article supplement (PMC2504837)
Supplement: 0803309105_0803309105SI.pdf [file 0803309105_0803309105SI.pdf]

# Supporting Information

Jin *et al.* 10.1073/pnas.0803309105

PNAS PNAS PNAS PNAS PNAS

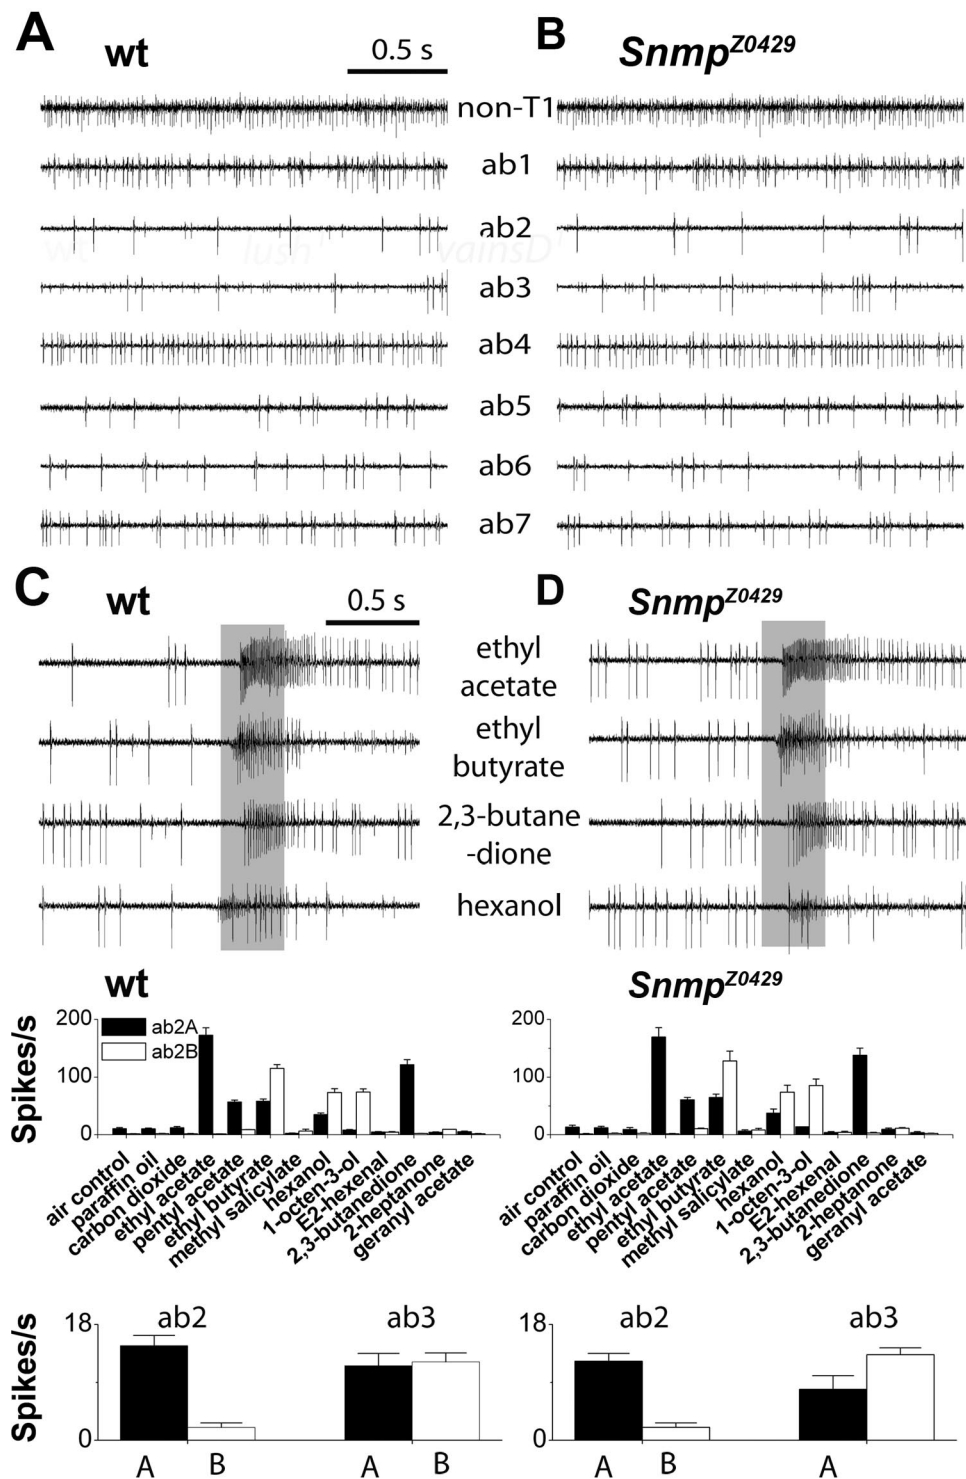

**Fig. S1.** Odor responses of small basiconic and nonT1 trichoid sensilla are not altered in *Snmp*<sup>Z0429</sup>. (A and B) Representative raw-traces of olfactory neurons in nonT1, large, and small basiconic sensilla are shown for both wild type (A) and *Snmp*<sup>Z0429</sup> mutants (B). (C and D) Spontaneous and odor-evoked responses of large basiconic sensilla ab2 and ab3 chemosensory neurons are not affected by the *Snmp*<sup>Z0429</sup> mutation. Control flies (C) and *Snmp*<sup>Z0429</sup> mutants (D) are shown. Bar graphs represent mean odor responses  $\pm$  SEM ( $n = 10$ ). Significance between groups was tested by ANOVA (ab2A,  $P = 0.24833$ ; ab2B,  $P = 0.9763$ ; ab3A,  $P = 0.21067$ ; ab3B,  $P = 0.53463$ ). Odor-evoked responses of *Snmp*<sup>Z0429</sup> mutants are not different from wild type controls. Spontaneous activity is also unaffected by *Snmp*<sup>Z0429</sup> (lower bar graphs). To classify individual basiconic sensillum subtype we used a set of 11 different odor stimuli (12), as well as the negative control odors air and paraffin oil. All odorants were diluted  $^{-2}$  in paraffin oil except for 2,3-butanedione which was diluted  $^{-2}$  in water. Odorants were freshly prepared prior to use for these experiments.

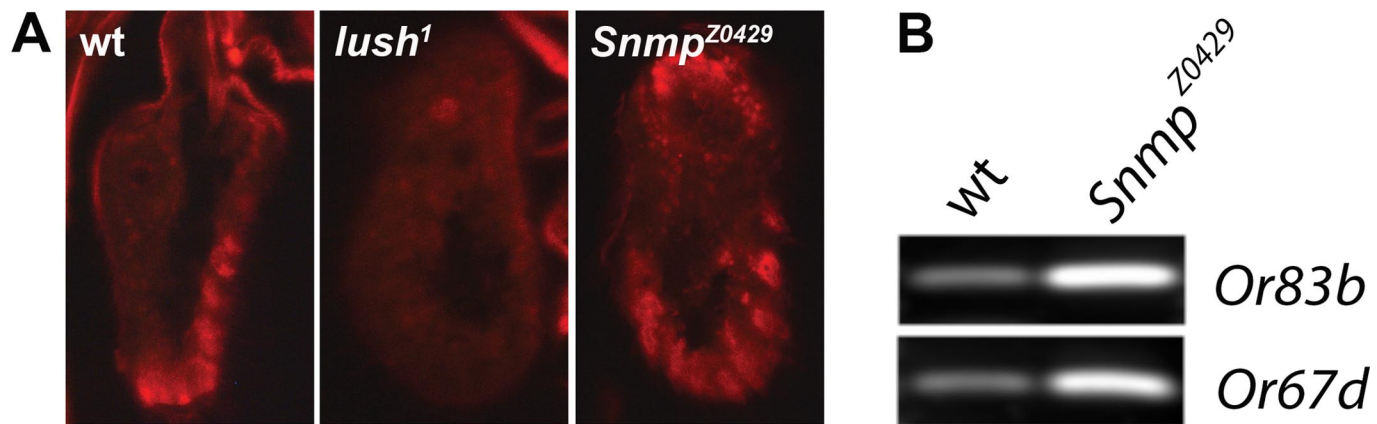

**Fig. S2.** *lush* and *Or67d* expression are not affected in the *Snpmp<sup>Z0429</sup>* mutant. (A) Immunofluorescent detection of LUSH protein in antenna sections in wild type, *lush<sup>1</sup>*, and *Snpmp<sup>Z0429</sup>* mutants. (B) RT-PCR of *Or83b* and *Or67d* from control and *Snpmp<sup>Z0429</sup>* mutant antennae.
